# Supplementary material for: Analyzing the impact of the size of fluoro and chloro substituents on induced mesomorphism in hydrogen bonded liquid crystals
Source: Royal Society of Chemistry journal article supplement (doi:10.1039/d3ra08569d), 2024-01-01
Supplement: d3ra08569d1.pdf [file d3ra08569d1.pdf]

**Analyzing the impact of the size of fluoro and chloro substituents on induced mesomorphism in hydrogen bonded liquid crystals**

Sonali M K<sup>1</sup>, Rajeev K Sinha<sup>2</sup>, Silpa Elizabeth Peter<sup>1</sup>, NV Anil Kumar<sup>1</sup>, Nirmal Mazumder<sup>3</sup>, Sindhoora Kaniyala Melanthota<sup>3</sup>, Mohammed Azeezulla Nazrulla<sup>1</sup>, Poornima Bhagavath<sup>1\*</sup>

<sup>1</sup>Department of Chemistry, Manipal Institute of Technology, Manipal Academy of Higher Education, Manipal 576 104, Karnataka, India

<sup>2</sup>Department of Physics, Birla Institute of Technology Mesra, Ranchi-835215, Jharkhand, India.

<sup>3</sup>Department of Biophysics, Manipal School of Life Sciences, Manipal Academy of Higher Education, Manipal, Karnataka, India-576104

**\*Corresponding author**

Dr. Poornima Bhagavath,

Department of Chemistry,

Manipal Institute of Technology,

Manipal-576104

Karnataka, India

Email: [poornima.nayak@manipal.edu](mailto:poornima.nayak@manipal.edu)

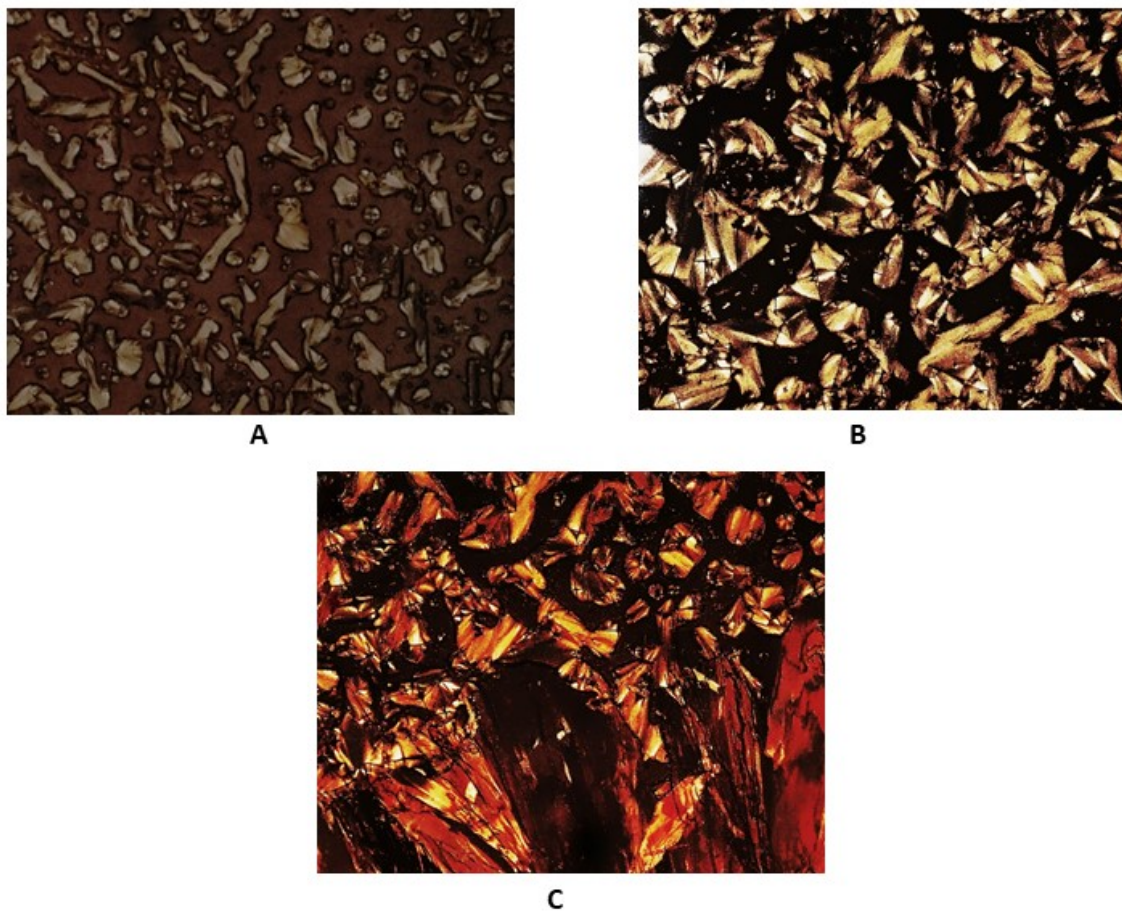

**Figure-S1: Focal conic fans exhibited by P8:4FBA at (A) 91°C (B) 64°C and (C) 44°C**

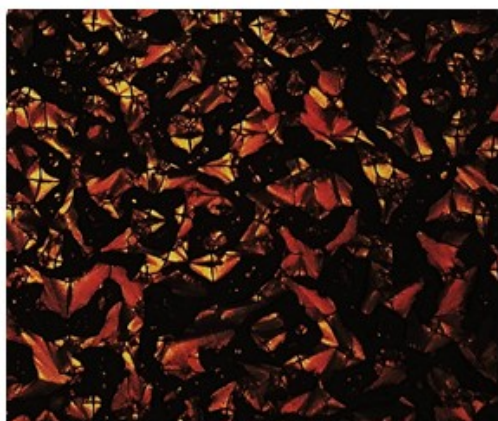

**A**

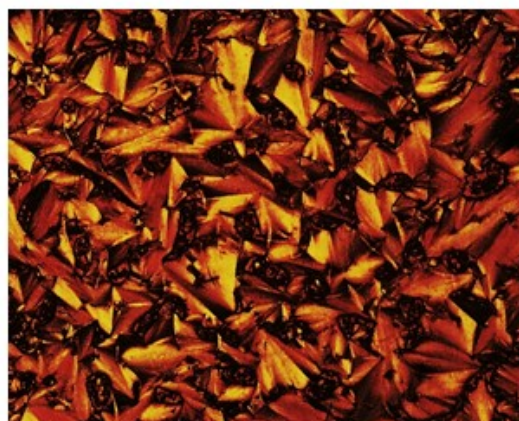

**B**

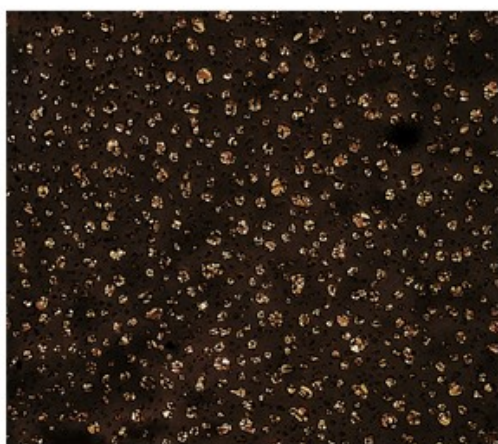

**C**

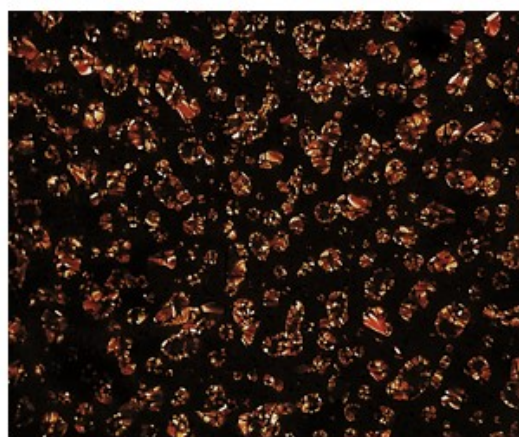

**D**

**Figure-S2: Focal conic fans exhibited by (A) P8:2FBA (10X) at 38°C, (B) P8:3FBA (10X) at 52°C, (C) P8:3CIBA (10X) at 58°C and (D) P8:4CIBA (10X) at 72°C**
